# Supplementary material
Source: publisher figshare collection journal article supplement (https://sage.figshare.com/ndownloader/files/17505335)
Supplement: Supplementary file 1 [file 17505335]

**Codebook The Arnhem School Study (TASS):**  
**Secondary schools module wave 4-7**

Author: Tobias H. Stark

Data collection: Wave 4: September 2008  
(weeks 2 and 3 after the school year started)

Wave 5: December 2008

Wave 6: June 2009

Wave 7: May 2010

Questionnaires (in Dutch): Wave 4: vragenlijst wave4(VO).pdf

Wave 5: vragenlijst wave5(VO).pdf

Wave 6: vragenlijst wave6(VO).pdf

Wave 7: vragenlijst wave7(VO).pdf

Analyses files: TASScombine4567.dta

## **Content**

Secondary school module of The Arnhem School Study (TASS)

Content of questionnaires

Variable names

Important comments before using the data

Questions deleted or modified for privacy reasons

Variable overview

## **Secondary school module of The Arnhem School Study (TASS)**

The secondary school module of TASS build on a study among primary schools. The data for the primary school sample of TASS (Wave 1-3) were collected at 26 different primary schools in the city of Arnhem, in the Netherlands. Respondents included students attending the last 3 years of primary education (age 10-12). Consequently, the secondary school module of TASS starts with Wave 4.

The goal of the secondary school module was to capture an entire cohort of students in the city after their transition from primary to secondary school. The data collection for the secondary sample of TASS (Wave 4-7) took place among students (age 12-13 at the first wave) attending one of the 12 secondary schools in Arnhem. Sixty-one classes (88.4% of all first-year classes in secondary schools in Arnhem) took part in the study. Since all schools were located within the same city, TASS is not a random sample. However, almost all schools in Arnhem participated, meaning that schools did not self-select into the sample.

Of the 1,401 students in Wave 4, 1,219 participated in the survey (response rate = 87%). In the data collection for Wave 5, 1,246 students participated (response rate = 88,1%). Moreover, Wave 4 and Wave 5 took place early in the school year in 2008. Data for Wave 6 were collected at the end of the school year in 2009 and 1,220 students participated in this wave (response rate = 86%). Lastly, in the final data collection for Wave 7, 928 students participated in this wave which took place at the end of the school year in 2010 (response rate = 75.5%).

Note, however, that some classes are typically excluded from analysis due to data quality issues (see section “Important comments before using the data”). In publications, TASS is considered to consist of 1,350 students present in the classes at wave 4 of which 1,219 participated (response rate = 90.3%).

Non-participation was due to parents’ disapproval of their child’s participation in the study (2.2 percent) or due to non-response of children who were not present in class when the data were collected.

Parents received an information letter before the first wave of the secondary school module which offered them the opportunity to deny participation of their child. In addition, students were informed that their answers would be treated confidentially and that they were free to discontinue their participation.

The survey of each wave consisted of a self-completion online questionnaire which was completed simultaneously on separate computers in a computer lab during school hours. Typically, a teacher (and sometimes trained research assistants) read instructions to the students and supervised completion of the questionnaires.

## Content of questionnaires

The questionnaires of *Wave 4* to *Wave 7* include the following topics:

1. Sociometric measures within class
2. Sociometric measures outside class
3. Own opinions: *Leisure activities, behaviour, music, clothing brands, clothing styles*
4. Sociodemographic background and family: *Countries of birth, family composition, Family Affluence Scale, relative SES, language abilities, ethnicity visitors, ethnic self-identification, religion*
5. Stereotypes and contact with other groups
6. Personality questions (*BIG 5*)
7. Stereotypes and contact with other groups

The corresponding questionnaires used in each wave can be found in the PDF files.

## Variable names

Variable names are based on the subparts of the questionnaires and combined with a letter that refers to the Wave in question. Each additional letter or number in the variable name indicates a sub question. System variables are based on the variable names identified in Wave 4 and remain either the same in the other waves or are indicated with an additional 5 (Wave 5), 6 (Wave 6) or 7 (Wave 7) in case the variable in Wave 4 was referred to with an additional 4.

### *Waves*

A letter is assigned to each wave, which also appears in the name of most variables. However, the sociometric measures within a class are indicated with a different letter in each wave.

*M* : Wave 4 (*N* : sociometric measures within class)

*P* : Wave 5 (*O* : sociometric measures within class)

*R* : Wave 6 (*Q* : sociometric measures within class)

*S* : Wave 7 (*T* : sociometric measures within class)

### *Examples*

*O\_c\_13*: item 3 (*O\_c\_13*) of the *sociometric measures within class* in Wave 5 (*O\_c\_13*) and refers to the classmate with randomly assigned ID number 13 within the class (*O\_c\_13*).

*M\_ab\_4*: item from Wave 4 (*M\_ab\_4*) was asked in the *ethnicity of visitors* part belonging to the *sociodemographic background and family* topic of the questionnaire (*M\_ab\_4*) and refers to sub question 4 (*M\_ab\_4*).

An overview of the variables and labels in Wave 4 – Wave 7 can be found in Table 1. Variable names in the table belong to the Stata data sets.

## **Important comments before using the data**

### *Classes*

In two schools not all classes participated in data collection: two classes are missing in *school 11* and four classes in *school 12*. This is also the reason why out-of-classroom friends could not be nominated in these two schools. We didn't know the names of the students in those classes that did not participate.

*Class 26* did not participate in *Wave 4* and was used for pilot study in *Wave 5* and *Wave 6*. The questions are therefore partly not comparable.

*Class 60* did only participate in *Wave 6* and accordingly no information available on ethnicity.

*Class 62* and one school for "special education" (*classes 45* and *46*) did never participate. ID-class nr. 1 was used for pretesting the questionnaire. None of these ID numbers exist in the dataset.

*School 12* was rather uncooperative. Accordingly, *classes 65* and *66* from *school 12* filled in questionnaire always unsupervised in leisure time. Therefore, the answer quality is unknown and these two classes are typically not included in analyses.

### *Waves*

*Students in Classes 53* and *52* were completely reshuffled after *Wave 4*. Accordingly, *Wave 4* of these classes is difficult to use for longitudinal network studies.

Not all schools agreed to participate in *Wave 7* (one year after *wave 6*). Moreover, many students transferred between classes, leaving the composition incomparable across time. This has to be kept in mind for longitudinal analyses (especially network analyses). In addition, since students transferred between classes in *Wave 7*, the class composition was so different in some schools that we generated new ID-numbers for classes. Every ID-number above 70 is new.

*Wave 7*: The schools with *id nr 6* and *id nr 8* were fused after the first school year. The new fused school is the school with the new *id nr 15*. When the class composition changed completely between year 1 and year 2, the class got a new *group id (75* and *85)*

### ***Longitudinal network analysis***

Please keep in mind that students transferred between classrooms (also in the first three waves). Check variables *idclass4* – *idclass7* to identify these students and prepare the networks appropriately.

### ***Identifying variables***

Students who also participated in the primary school module can be linked to the primary school data using the variable “*idprimary*”.

Class composition between *Wave 6* and *Wave 7* remained comparable (+/- 2 students) in id-number (20 classes): 12, 13, 14, 15, 16, 17, 19, 20, 22, 23, 24, 25, 33, 35, 36, 37, 38, 48 (-3), 59 (-3), 63.

### ***Sociometric measures***

In order to analyze network data, sort the variables according to position in *nomnum4*, *nomnum5*, *nomnum6*, *nomnum7*. These variables indicate the number a student was nominated in the sociometric variables. For instance, *O\_c\_13* (Wave 5) reference to the nominations made about the student with number 13 in the variable “*nomnum5*” in a particular class.

In *Wave 7* the variables *W7\_7\_1* – *W7\_7\_244* are listed in Table 1. However, we never received this variable from the survey company. Probably something went wrong with the data collection.

### ***Questions about out-of-class friends***

The questions about out-of-class friends (proxy questions) are stored in another data-set (*vriendenmat.dta*) and are not part of the general data set.

### ***Grades***

We did not receive grades from all schools and only some grades from a subsample of schools.

## **Questions deleted or modified for privacy reasons**

The schools provided information on respondents' street name, zip code and city. For privacy reasons, information about the home address of respondents was deleted. In addition, the names of respondents' school and primary school were modified by an ID-number.

## Variable overview

| <b>Table 1.</b> Overview of variables in Wave 4 to Wave 7 |               |               |               |                                                       |                                                                                                                     |
|-----------------------------------------------------------|---------------|---------------|---------------|-------------------------------------------------------|---------------------------------------------------------------------------------------------------------------------|
| <b>Wave 4</b>                                             | <b>Wave 5</b> | <b>Wave 6</b> | <b>Wave 7</b> | <b>Label</b>                                          | <b>Values</b>                                                                                                       |
| <b>Identifying variables</b>                              |               |               |               |                                                       |                                                                                                                     |
| wave4                                                     | wave5         | wave6         | wave7         | Child participated in wave                            | 1 = did participate<br>0 = was in class but did not participate<br>Missing value = student not in class during wave |
| idkid                                                     | idkid         | idkid         | idkid         | ID number child                                       |                                                                                                                     |
| idclass4                                                  | idclass5      | idclass6      | idclass7      | ID number class                                       |                                                                                                                     |
| idschool                                                  | idschool      | idschool      | idschool7     | ID number school                                      |                                                                                                                     |
|                                                           |               | samplesplit   |               | Treatment group in survey experiment                  | 0 = Questions immediately asked<br>1 = Questions asked at end                                                       |
| disap                                                     | disap         | disap         | disap         | Parents did not grant permission to participate       | 1 = no permission                                                                                                   |
| problem4                                                  | problem5      | problem6      | problem7      | Problems with data collection (that are not fixed)    |                                                                                                                     |
| nomnum4                                                   | nomnum5       | nomnum6       | nomnum7       | Position of nomination of this child in class         |                                                                                                                     |
|                                                           | newwave5      | newwave6      | newwave7      | Child new in class                                    | 1= new                                                                                                              |
| idprimary                                                 |               |               |               | ID number from primary school sample                  |                                                                                                                     |
|                                                           |               | level         |               | Educational level (academic track) wave 4 - 6         | 0 = vmbo<br>1 = vmbo/havo<br>2 = havo<br>3 = havo/vwo<br>4 = vwo<br>5 = gymnasium                                   |
| <b>Socio-metric measures within class</b>                 |               |               |               |                                                       |                                                                                                                     |
| N_a_1 - N_a_31                                            |               |               |               | a_X: Classmate already friend at beginning schoolyear | For all ‘Socio-metric measures within class’                                                                        |

|                   |                   |                   |                   |                                                                     |                                                                                                      |
|-------------------|-------------------|-------------------|-------------------|---------------------------------------------------------------------|------------------------------------------------------------------------------------------------------|
|                   |                   |                   |                   |                                                                     | unless indicated<br>0 = no<br>1 = yes                                                                |
| N_b_1 -<br>N_b_31 |                   |                   |                   | b_X: Already<br>classmate at<br>elementary<br>school                |                                                                                                      |
| N_c_1 -<br>N_c_31 | O_c_1 -<br>O_c_30 | Q_c_1 -<br>Q_c_30 | T_c_1 -<br>T_c_37 | c_X: Classmate<br>that kid meets<br>after school                    |                                                                                                      |
| N_d_1 -<br>N_d_31 | O_d_1 -<br>O_d_30 | Q_d_1 -<br>Q_d_30 | T_d_1 -<br>T_d_37 | d_X: Classmate<br>who is best<br>friend                             |                                                                                                      |
| N_e_1 -<br>N_e_31 |                   |                   |                   | e_X: Classmate<br>that helps with<br>practical<br>problems          |                                                                                                      |
| N_f_1 -<br>N_f_31 | O_f_1 -<br>O_f_30 | Q_f_1 -<br>Q_f_30 | T_f_1 -<br>T_f_37 | f_X: Classmate<br>that helps with<br>emotional<br>problems          |                                                                                                      |
| N_g_1 -<br>N_g_31 | O_g_1 -<br>O_g_30 | Q_g_1 -<br>Q_g_30 |                   | g_X: Classmate<br>that irritates<br>once in a while                 |                                                                                                      |
| N_h_1 -<br>N_h_31 | O_h_1 -<br>O_h_30 | Q_h_1 -<br>Q_h_30 | T_h_1 -<br>T_h_37 | h_X: Popular<br>classmate                                           |                                                                                                      |
| N_i_1 -<br>N_i_31 | O_i_1 -<br>O_i_30 | Q_i_1 -<br>Q_i_30 | T_i_1 -<br>T_i_37 | i_X: Classmate<br>that kid often<br>works together<br>with in class |                                                                                                      |
| N_j_1 -<br>N_j_31 | O_j_1 -<br>O_j_30 | Q_j_1 -<br>Q_j_30 | T_j_1 -<br>T_j_37 | j_X: How much<br>kid likes X                                        | -4 = absolutely<br>don't like<br>-2 = don't like<br>0 = neutral<br>2 = like<br>4 = like very<br>much |
|                   | O_l_1 -<br>O_l_30 |                   |                   | l_X: Classmate<br>that has same<br>music taste                      |                                                                                                      |
|                   | O_m_1 -<br>O_m_30 |                   |                   | m_X: Classmate<br>that has same<br>clothing style                   |                                                                                                      |
|                   |                   | Q_n_1 -<br>Q_n_30 | T_n_1 -<br>T_n_37 | n_X: Who<br>bullies you?                                            |                                                                                                      |
|                   |                   | Q_o_1 -<br>Q_o_30 |                   | o_X: Who do<br>you meet<br>outside school at<br>a club?             |                                                                                                      |

|                                           |                    |                    |                      |                                                                       |                                                                                                                                                                                                                                           |
|-------------------------------------------|--------------------|--------------------|----------------------|-----------------------------------------------------------------------|-------------------------------------------------------------------------------------------------------------------------------------------------------------------------------------------------------------------------------------------|
|                                           |                    | Q_p_1 -<br>Q_p_30  |                      | p_X: With whom often together in a team in gym?                       |                                                                                                                                                                                                                                           |
|                                           |                    |                    | W7_7_1 –<br>W7_7_244 | How typical [ethnicity] is X?                                         | Not in dataset (see “important notes before using data”)                                                                                                                                                                                  |
| <b>Socio-metric measures within class</b> |                    |                    |                      |                                                                       |                                                                                                                                                                                                                                           |
| M_a                                       | P_a                | R_a                | S_a                  | Does kid have best friends in another first class at same high school | 0 = no<br>1 = yes                                                                                                                                                                                                                         |
| M_b                                       |                    |                    | S_b                  | Where most of kids friends are                                        | 1 = in my class<br>2 = in another first class of my school<br><br><i>Wave 4</i><br>3 = in a higher class of my school<br><i>Wave 7</i><br>3 = in another second class of my school<br><br>4 = outside my school<br>5 = don't have friends |
| M_c                                       |                    |                    |                      | Friends that are most important                                       | 1 = friends in class<br>2 = friends in another class at this school<br>3 = friends outside this class<br>4 = all equally important                                                                                                        |
| N_k_1-<br>N_k_255                         | O_k_1 -<br>O_k_244 | Q_k_1 –<br>Q_k_224 | T_k_1 –<br>T_251     | Best friend in another first class at same high school                | 0 = no<br>1 = yes                                                                                                                                                                                                                         |
| M_d                                       |                    |                    | S_d                  | Amount of Dutch friends outside class                                 | d – j :<br>continuous /<br>number                                                                                                                                                                                                         |

|                     |       |       |       |                                                            |                                                                                                                      |
|---------------------|-------|-------|-------|------------------------------------------------------------|----------------------------------------------------------------------------------------------------------------------|
| M_e                 |       |       | S_e   | Amount of Turkish friends outside class                    |                                                                                                                      |
| M_f                 |       |       | S_f   | Amount of Moroccan friends outside class                   |                                                                                                                      |
| M_g                 |       |       | S_g   | Amount of Surinamese friends outside class                 |                                                                                                                      |
| M_h                 |       |       | S_h   | Amount of Antillean friends outside class                  |                                                                                                                      |
| M_i                 |       |       | S_i   | Amount of other European friends outside class             |                                                                                                                      |
| M_j                 |       |       | S_j   | Amount of friends from other countries outside class       |                                                                                                                      |
| M_k                 |       |       |       | Kid is member of specific friend group                     | 0 = no<br>1 = yes                                                                                                    |
| M_k_t               |       |       |       | Name of group of friends kid has                           |                                                                                                                      |
| <b>Own opinions</b> |       |       |       |                                                            |                                                                                                                      |
| M_1_1               | P_1_1 | R_1_1 | S_1_1 | I_X: How much kid likes X (activity):<br>Internet chatting | For all "I_X" items:<br>1 = very stupid<br>2 = stupid<br>3 = neutral<br>4 = good<br>5 = very good<br>99 = don't know |
| M_1_2               |       |       |       | Playing<br>Playstation xbox<br>etc.                        |                                                                                                                      |
| M_1_3               |       |       |       | Doing sports                                               |                                                                                                                      |
| M_1_4               | P_1_4 | R_1_4 | S_1_4 | Hanging around on the street                               | Proxy question:<br>C_g_1-C_g_241<br>See "note before using data"                                                     |
| M_1_5               | P_1_5 | R_1_5 | S_1_5 | Smoking cigarettes                                         |                                                                                                                      |
| M_1_6               |       |       |       | Shopping                                                   |                                                                                                                      |
| M_1_7               |       |       |       | Gossiping                                                  |                                                                                                                      |

|        |        |        |        |                                                        |                                                                                                                                                                              |
|--------|--------|--------|--------|--------------------------------------------------------|------------------------------------------------------------------------------------------------------------------------------------------------------------------------------|
| M_1_8  | P_1_8  | R_1_8  | S_1_8  | Riding bicycle past red traffic light                  |                                                                                                                                                                              |
| M_1_9  | P_1_9  | R_1_9  | S_1_9  | Doing homework                                         | Proxy question: C_h_1-C_h_241<br>See “note before using data”                                                                                                                |
|        | P_1_10 | R_1_10 | S_1_10 | Going to school                                        |                                                                                                                                                                              |
| M_m_1  | P_m_1  | R_m_1  | S_m_1  | Wearing branded clothes                                | Proxy question: C_i_1 – C_i_241<br>See “note before using data”                                                                                                              |
| M_m_2  | P_m_2  | R_m_2  | S_m_2  | Skipping school                                        |                                                                                                                                                                              |
| M_m_3  | P_m_3  | R_m_3  | S_m_3  | Listening to new music                                 |                                                                                                                                                                              |
| M_m_4  | P_m_4  | R_m_4  | S_m_4  | Destroying / damaging things                           |                                                                                                                                                                              |
| M_m_5  | P_m_5  | R_m_5  | S_m_5  | Kissing boy or girl                                    |                                                                                                                                                                              |
| M_m_6  | P_m_6  | R_m_6  | S_m_6  | Drinking alcohol                                       |                                                                                                                                                                              |
| M_m_7  | P_m_7  | R_m_7  | S_m_7  | Going out                                              |                                                                                                                                                                              |
| M_m_8  | P_m_8  | R_m_8  | S_m_8  | Hitting someone                                        |                                                                                                                                                                              |
| M_m_9  | P_m_9  | R_m_9  | S_m_9  | Reading schoolbooks at home                            |                                                                                                                                                                              |
| M_m_10 | P_m_10 | R_m_10 | S_m_10 | Dressing in specific clothing style (e.g. skate style) |                                                                                                                                                                              |
| M_n_1  | P_n_1  | R_n_1  | S_n_1  | n_X: How much kid likes type of music:<br>Dutch pop    | Proxy: C_d_1-C_d_241<br>For all “n_X” items:<br>1 = very stupid<br>2 = stupid<br>3 = neutral<br>4 = good<br>5 = very good<br>99 = don’t know<br>See “note before using data” |
| M_n_2  | P_n_2  | R_n_2  | S_n_2  | Popular Dutch folk                                     |                                                                                                                                                                              |
| M_n_3  | P_n_3  | R_n_3  | S_n_3  | Dutch rap                                              | Proxy: C_e_1-C_e_241<br>See “note before using data”                                                                                                                         |
| M_n_4  | P_n_4  | R_n_4  | S_n_4  | Foreign rap                                            |                                                                                                                                                                              |

|                                               |       |       |       |                                                        |                                                                                                                                |
|-----------------------------------------------|-------|-------|-------|--------------------------------------------------------|--------------------------------------------------------------------------------------------------------------------------------|
| M_n_5                                         |       |       |       | R & B                                                  |                                                                                                                                |
| M_n_6                                         | P_n_6 | R_n_6 | S_n_6 | Rock                                                   |                                                                                                                                |
| M_n_7                                         | P_n_7 | R_n_7 | S_n_7 | Foreign pop                                            | Proxy: C_f_1-C_f_241<br>See “note before using data”                                                                           |
| M_o_1                                         | P_o_1 | R_o_1 |       | o_X: How much kid likes types of brand clothes: Adidas | For all “o_X” items:<br>1=very stupid,<br>2=stupid,<br>3=neutral,<br>4=good, 5=very good, 99=don’t know                        |
| M_o_2                                         | P_o_2 | R_o_2 |       | C & A                                                  |                                                                                                                                |
| M_o_3                                         | P_o_3 | R_o_3 |       | Diesel                                                 |                                                                                                                                |
| M_o_4                                         |       |       |       | Puma                                                   |                                                                                                                                |
| M_o_5                                         | P_o_5 | R_o_5 |       | H&M                                                    |                                                                                                                                |
| M_o_6                                         | P_o_6 | R_o_6 |       | Bjorn Borg                                             |                                                                                                                                |
| M_o_7                                         | P_o_7 | R_o_7 |       | Nike                                                   |                                                                                                                                |
| M_o_8                                         |       |       |       | Cars                                                   |                                                                                                                                |
| M_p_1                                         | P_p_1 | R_p_1 | S_p_1 | p_X: How much kid likes clothing style: Skate          | For all “p_X” and “M_q” items:<br>1 = very stupid<br>2 = stupid<br>3 = neutral<br>4 = good<br>5 = very good<br>99 = don’t know |
| M_p_2                                         | P_p_2 | R_p_2 | S_p_2 | Sport                                                  |                                                                                                                                |
| M_p_3                                         | P_p_3 | R_p_3 | S_p_3 | Rap/hip hop                                            |                                                                                                                                |
| M_p_4                                         | P_p_4 | R_p_4 | S_p_4 | Gothic                                                 |                                                                                                                                |
| M_p_5                                         | P_p_5 | R_p_5 | S_p_5 | Latest fashion                                         |                                                                                                                                |
| M_p_6                                         |       |       |       | Ordinary                                               |                                                                                                                                |
| M_q                                           |       |       |       | How much kid likes it when girls wear make up          |                                                                                                                                |
| <b>Sociodemographic background and family</b> |       |       |       |                                                        |                                                                                                                                |
| M_r                                           |       |       | S_r   | Gender kid                                             | Asked new kids in Wave 5 and 7<br>1 = male<br>2 = female<br>(variable = “sex”)                                                 |
| M_t_1                                         | P_t_1 |       | S_t_1 | Country of birth kid                                   | For all “country of birth” items:<br>Selected country                                                                          |

|        |       |                                               |                                                |                                                              |                                                                                                                                                                                 |
|--------|-------|-----------------------------------------------|------------------------------------------------|--------------------------------------------------------------|---------------------------------------------------------------------------------------------------------------------------------------------------------------------------------|
| M_t_2  | P_t_2 |                                               | S_t_2                                          | Country of birth father                                      |                                                                                                                                                                                 |
| M_t_3  | P_t_3 |                                               | S_t_3                                          | Country of birth mother                                      |                                                                                                                                                                                 |
| M_u_1  | P_u_1 |                                               | S_u_1                                          | Country of birth fathers mother                              |                                                                                                                                                                                 |
| M_u_2  | P_u_2 |                                               | S_u_2                                          | Country of birth fathers father                              |                                                                                                                                                                                 |
| M_u_3  | P_u_3 |                                               | S_u_3                                          | Country of birth mothers mother                              |                                                                                                                                                                                 |
| M_u_4  | P_u_4 |                                               | S_u_4                                          | Country of birth mothers father                              |                                                                                                                                                                                 |
| M_v_1  |       |                                               |                                                | Kid has sisters                                              | 0 = no<br>1 = yes                                                                                                                                                               |
| M_v_1t |       |                                               |                                                | Number of sisters                                            | Number                                                                                                                                                                          |
| M_v_2  |       |                                               |                                                | Kid has brothers                                             | 0 = no<br>1 = yes                                                                                                                                                               |
| M_v_2t |       |                                               |                                                | Number of brothers                                           | Number                                                                                                                                                                          |
| M_v_3  |       |                                               | S_v_3                                          | Parents are divorced                                         | 0 = no<br>1 = yes (check)<br><i>Wave 7</i><br>1 = yes<br>2 = no                                                                                                                 |
| M_v_4  |       |                                               |                                                | Place kid lives most of the time of the week (father/mother) | 1 = both parents<br>2 = father<br>3 = mother<br>4 = father and stepmother<br>5 = mother and stepfather<br>6 = other                                                             |
| M_v_4t |       |                                               |                                                | Open answer: place kid lives most of the time of the week    | Open answer                                                                                                                                                                     |
|        |       | R_v_5<br><br>open answers recoded into "eduf" | S_v_5<br><br>open answers recoded into "eduf7" | Highest educational degree father                            | For items education father/mother:<br>1 = no/primary<br>2 = lbo/vbo/mavo/vmbo<br>3 = mbo<br>4 = have / vwo<br>5 = hbo / universiteit<br>98 = see open answer<br>99 = don't know |

|        |  |                                           |                                            |                                                           |                                                                                                                                           |
|--------|--|-------------------------------------------|--------------------------------------------|-----------------------------------------------------------|-------------------------------------------------------------------------------------------------------------------------------------------|
|        |  | R_v_6                                     | S_v_6                                      | Highest educational degree father (open answer)           | Open answer                                                                                                                               |
|        |  | R_v_7<br>Open answers recoded into "edum" | S_v_7<br>Open answers recoded into "edum7" | Highest educational degree mother                         |                                                                                                                                           |
|        |  | R_v_8                                     | S_v_8                                      | Highest educational degree mother (open answer)           | Open answer                                                                                                                               |
|        |  |                                           | S_v_9                                      | Does your family own a car?                               | 0 = no<br>1 = one<br>2 = two or more                                                                                                      |
|        |  |                                           | S_v_10                                     | Do you have your own bedroom?                             | 0 = no<br>1 = yes                                                                                                                         |
|        |  |                                           | S_v_11                                     | In the last year, how often did you go away for vacation? | 0 = never<br>1 = once<br>2 = twice<br>3 = three times<br>4 = four or more times                                                           |
|        |  |                                           | S_v_12                                     | How many computers does your family have at home?         | 0 = none<br>1 = 1<br>2 = 2<br>3 = 3<br>4 = 4 or more                                                                                      |
|        |  |                                           | S_v_13                                     | In what kind of house do you live?                        | 1 = flat<br>2 = row house<br>3 = twin house<br>4 = standing alone house                                                                   |
|        |  |                                           | S_v_14                                     | Compared to others how wealthy<br><i>Recoded</i>          | 1 = much less wealthy<br>6 = much more wealthy                                                                                            |
| M_aa_1 |  |                                           | S_aa_1                                     | Mother speaks well Dutch                                  | For all "aa_X" items:<br>1 = absolutely not true<br>2 = not true<br>3 = little true<br>4 = true<br>5 = absolutely true<br>99 = don't know |

|        |  |  |        |                                                          |                                                                                                           |
|--------|--|--|--------|----------------------------------------------------------|-----------------------------------------------------------------------------------------------------------|
| M_aa_2 |  |  | S_aa_2 | Father speaks well Dutch                                 |                                                                                                           |
| M_aa_3 |  |  | S_aa_3 | Kid speaks Dutch with parents                            |                                                                                                           |
| M_aa_4 |  |  | S_aa_4 | Kid speaks Dutch with brother sisters                    |                                                                                                           |
| M_aa_5 |  |  | S_aa_5 | Kid watches Dutch television at home                     |                                                                                                           |
| M_aa_6 |  |  | S_aa_6 | Parents often read Dutch newspaper                       |                                                                                                           |
| M_ab_1 |  |  |        | Dutch people visit home kid                              | For all "ab_X" items:<br>1 = never<br>2 = sometimes<br>3 = often                                          |
| M_ab_2 |  |  |        | Turkish visit home kid                                   |                                                                                                           |
| M_ab_3 |  |  |        | Moroccan visit home kid                                  |                                                                                                           |
| M_ab_4 |  |  |        | Surinamese visit home kid                                |                                                                                                           |
| M_ab_5 |  |  |        | Antillean visit home kid                                 |                                                                                                           |
| M_ab_6 |  |  |        | People from other groups visit home kid                  |                                                                                                           |
| M_ac   |  |  | S_ac   | Religion                                                 | 1 = roman catholic<br>2 = protestant Christian<br>3 = muslim<br>4 = hindu<br>5 = no religion<br>6 = other |
| M_ac_t |  |  | S_ac_t | String variable religion                                 | Open Answer                                                                                               |
| M_ad   |  |  | S_ad   | Times kid does something that is related to own religion | 1 = once a week or more<br>2 = several times a month<br>3 = on special occasions<br>4 = never             |
| M_ae   |  |  | S_ae   | Importance religion to kid                               | 1 = very important                                                                                        |

|                                                    |                                      |                                      |                                      |                                                                                                                             |                                                                                                            |
|----------------------------------------------------|--------------------------------------|--------------------------------------|--------------------------------------|-----------------------------------------------------------------------------------------------------------------------------|------------------------------------------------------------------------------------------------------------|
|                                                    |                                      |                                      |                                      |                                                                                                                             | 2 = important<br>3 = neutral<br>4 = not important<br>5 = not important at all                              |
| <b>Ethnic self-identification</b>                  |                                      |                                      |                                      |                                                                                                                             |                                                                                                            |
| M_u_1                                              |                                      |                                      |                                      | Kid feels him or herself Dutch or is more affiliated with ethnicity parents                                                 | None                                                                                                       |
|                                                    |                                      | R_w_2                                | S_w_2                                | Do you feel Dutch?                                                                                                          | For all "w_X" items:<br>1 = absolutely not<br>5 = very strong                                              |
|                                                    |                                      | R_w_3                                | S_w_3                                | Do you feel (ethnic group father)?                                                                                          |                                                                                                            |
|                                                    |                                      | R_w_4                                | S_w_4                                | Do you feel (ethnic group mother)?                                                                                          |                                                                                                            |
|                                                    |                                      | R_w_5                                | S_w_5                                | Do you feel member of other group?                                                                                          |                                                                                                            |
|                                                    |                                      | R_w_6                                | S_w_6                                | How proud to be Dutch                                                                                                       |                                                                                                            |
|                                                    |                                      | R_w_7                                | S_w_7                                | How proud to be (ethnic group father)                                                                                       |                                                                                                            |
|                                                    |                                      | R_w_8                                | S_w_8                                | How proud to be (ethnic group mother)                                                                                       |                                                                                                            |
| <b>Stereotypes and contact toward other groups</b> |                                      |                                      |                                      |                                                                                                                             |                                                                                                            |
| M_af_1<br>M_ag_1<br>M_ah_1<br>M_ai_1               | P_af_1<br>P_ag_1<br>P_ah_1<br>P_ai_1 | R_af_1<br>R_ag_1<br>R_ah_1<br>R_ai_1 | S_af_1<br>S_ag_1<br>S_ah_1<br>S_ai_1 | af_X: All Turks are<br>ag_X: All Dutch are<br>ah_X: All Moroccans are<br>ai_X: All people ethnic group father<br><br>Honest | For all "af_X" "ag_X" "ah_X" "ai_X" items:<br><br>1 = totally disagree<br>4 = neutral<br>7 = totally agree |
| M_af_2<br>M_ag_2                                   | P_af_2<br>P_ag_2                     | R_af_2<br>R_ag_2                     | S_af_2<br>S_ag_2                     | Friendly                                                                                                                    |                                                                                                            |

|                                      |                                      |                                      |                                      |                                      |                                                                                                                                 |
|--------------------------------------|--------------------------------------|--------------------------------------|--------------------------------------|--------------------------------------|---------------------------------------------------------------------------------------------------------------------------------|
| M_ah_2<br>M_ai_2                     | P_ah_2<br>P_ai_2                     | R_ah_2<br>R_ai_2                     | S_ah_2<br>S_ai_2                     |                                      |                                                                                                                                 |
| M_af_3<br>M_ag_3<br>M_ah_3<br>M_ai_3 | P_af_3<br>P_ag_3<br>P_ah_3<br>P_ai_3 | R_af_3<br>R_ag_3<br>R_ah_3<br>R_ai_3 | S_af_3<br>S_ag_3<br>S_ah_3<br>S_ai_3 | Smart                                |                                                                                                                                 |
| M_af_4<br>M_ag_4<br>M_ah_4<br>M_ai_4 | P_af_4<br>P_ag_4<br>P_ah_4<br>P_ai_4 | R_af_4<br>R_ag_4<br>R_ah_4<br>R_ai_4 | S_af_4<br>S_ag_4<br>S_ah_4<br>S_ai_4 | Helpful                              |                                                                                                                                 |
|                                      |                                      | R_av_1                               |                                      | How many Moroccans honest            | All "av_X" "aw_X" and "ax_x" items:<br>1 = (almost) nobody<br>2 = some<br>3 = about half<br>4 = a lot<br>5 = (almost) everybody |
|                                      |                                      | R_av_2                               |                                      | How many Moroccans friendly          |                                                                                                                                 |
|                                      |                                      | R_aw_1                               |                                      | How many Dutch honest                |                                                                                                                                 |
|                                      |                                      | R_aw_2                               |                                      | How many Dutch friendly              |                                                                                                                                 |
|                                      |                                      | R_ax_1                               |                                      | How many Turks honest                |                                                                                                                                 |
|                                      |                                      | R_ax_2                               |                                      | How many Turks friendly              |                                                                                                                                 |
| M_s_1                                |                                      |                                      |                                      | How well kid knows Moroccan people   | For all "s_X" items:<br>1 = not at all<br>3 = a little<br>5 = very well                                                         |
| M_s_2                                |                                      |                                      |                                      | How well kid knows Turkish people    |                                                                                                                                 |
| M_s_3                                |                                      |                                      |                                      | How well kid knows Surinamese people |                                                                                                                                 |
| <b>Personality questions (BIG 5)</b> |                                      |                                      |                                      |                                      |                                                                                                                                 |
|                                      | P_aj_1                               |                                      |                                      | I am aloof                           | For all "aj_X" items:<br>1 = totally disagree<br>2 = disagree                                                                   |

|                                           |          |          |  |                                                        |                                                                                                                 |
|-------------------------------------------|----------|----------|--|--------------------------------------------------------|-----------------------------------------------------------------------------------------------------------------|
|                                           |          |          |  |                                                        | 3 = disagree a little<br>4 = neutral<br>5 = agree a little<br>6 = agree<br>7 = totally agree<br>99 = don't know |
|                                           | P_aj_2   |          |  | I am assistant                                         |                                                                                                                 |
|                                           | P_aj_4   |          |  | I am (quickly) worried                                 |                                                                                                                 |
|                                           | P_aj_5   |          |  | I am quiet                                             |                                                                                                                 |
|                                           | P_aj_6   |          |  | I am friendly                                          |                                                                                                                 |
|                                           | P_aj_8   |          |  | I am anxious                                           |                                                                                                                 |
|                                           | P_aj_9   |          |  | I am creative in finding solutions                     |                                                                                                                 |
|                                           | P_aj_10  |          |  | I am curious                                           |                                                                                                                 |
|                                           | P_aj_12  |          |  | I am pleasant                                          |                                                                                                                 |
|                                           | P_aj_13  |          |  | I am solitary-minded                                   |                                                                                                                 |
|                                           | P_aj_14  |          |  | I am imaginative                                       |                                                                                                                 |
|                                           | P_aj_15  |          |  | I am jumpy                                             |                                                                                                                 |
|                                           | P_aj_17  |          |  | I am talkative                                         |                                                                                                                 |
|                                           | P_aj_18  |          |  | I am enjoyable                                         |                                                                                                                 |
|                                           | P_aj_20  |          |  | I am nervous                                           |                                                                                                                 |
|                                           | P_aj_21  |          |  | I can do lots of different things                      |                                                                                                                 |
|                                           | P_aj_22  |          |  | I am reserved                                          |                                                                                                                 |
|                                           | P_aj_23  |          |  | I am helpful                                           |                                                                                                                 |
|                                           | P_aj_24  |          |  | I am irritable                                         |                                                                                                                 |
|                                           | P_aj_25  |          |  | I like to discover new things                          |                                                                                                                 |
| <b>Influence parents and ethnic group</b> |          |          |  |                                                        |                                                                                                                 |
|                                           | P_ak_1_m | R_ak_1_m |  | My mother talks to me about my friendships             | For all "ak_X" "al_X" "at_X" and "au_X" items:<br>1 = totally disagree<br>4 = neutral<br>7 = totally agree      |
|                                           | P_ak_1_v | R_ak_1_v |  | My father talks to me about my friendships             |                                                                                                                 |
|                                           | P_ak_2_m | R_ak_2_m |  | My mother encourages me to invite peers that she likes |                                                                                                                 |
|                                           | P_ak_2_v | R_ak_2_v |  | My father encourages me                                |                                                                                                                 |

|  |          |          |  |                                                                            |  |
|--|----------|----------|--|----------------------------------------------------------------------------|--|
|  |          |          |  | to invite peers that he likes                                              |  |
|  | P_ak_4_m | R_ak_4_m |  | My mother tells me that friends I have now influence my future             |  |
|  | P_ak_4_v | R_ak_4_v |  | My father tells me that friends I have now influence my future             |  |
|  | P_ak_5_m | R_ak_5_m |  | My mother tells me that it is better not to be in touch with certain peers |  |
|  | P_ak_5_v | R_ak_5_v |  | My father tells me that it is better not to be in touch with certain peers |  |
|  | P_ak_6_m | R_ak_6_m |  | My mother gives me advice if I have problems with friends                  |  |
|  | P_ak_6_v | R_ak_6_v |  | My father gives me advice if I have problems with friends                  |  |
|  | P_ak_8_m | R_ak_8_m |  | My mother tells it to me if she disapproves the behavior of my friends     |  |
|  | P_ak_8_v | R_ak_8_v |  | My father tells it to me if he disapproves the behavior of my friends      |  |
|  | P_ak_9_m |          |  | My mother is ashamed of me if I don't behave well                          |  |
|  | P_ak_9_v |          |  | My father is ashamed of me if I don't behave well                          |  |

|  |           |           |          |                                                               |  |
|--|-----------|-----------|----------|---------------------------------------------------------------|--|
|  | P_ak_10_m | R_ak_10_m |          | My mother encourages me to do things with peers she likes     |  |
|  | P_ak_10_v | R_ak_10_v |          | My father encourages me to do things with peers she likes     |  |
|  | P_ak_11_m | R_ak_11_m |          | My mother would approve of me having Dutch friends            |  |
|  | P_ak_11_v | R_ak_11_v |          | My father would approve of me having Dutch friends            |  |
|  | P_ak_12_m | R_ak_12_m |          | My mother would approve of me having Turkish friends          |  |
|  | P_ak_12_v | R_ak_12_v |          | My father would approve of me having Turkish friends          |  |
|  | P_ak_13_m | R_ak_13_m |          | My mother would approve of me having Moroccan friends         |  |
|  | P_ak_13_v | R_ak_13_v |          | My father would approve of me having Moroccan friends         |  |
|  | P_al_1_m  |           | S_al_1_m | It's important to me that my mother is proud of me            |  |
|  | P_al_1_v  |           | S_al_1_v | It's important to me that my father is proud of me            |  |
|  | P_al_2_m  |           | S_al_2_m | The advice of my mother is important to me if I make a choice |  |
|  | P_al_2_v  |           | S_al_2_v | The advice of my father is important to me                    |  |

|  |          |         |          |                                                        |  |
|--|----------|---------|----------|--------------------------------------------------------|--|
|  |          |         |          | if I make a choice                                     |  |
|  | P_al_3_m |         | S_al_3_m | My mother is a good example to me for how to do things |  |
|  | P_al_3_v |         | S_al_3_v | My father is a good example to me for how to do things |  |
|  | P_al_4_m |         | S_al_4_m | I don't like it when my mother is ashamed of me        |  |
|  | P_al_4_v |         | S_al_4_v | I don't like it when my father is ashamed of me        |  |
|  | P_al_5_m |         | S_al_5_m | I do what my mother tells me to do                     |  |
|  | P_al_5_v |         | S_al_5_v | I do what my father tells me to do                     |  |
|  |          | R_at_1  |          | at_X: Important for parents: good grades               |  |
|  |          | R_at_2  |          | same religion                                          |  |
|  |          | R_at_3  |          | behave according to rules                              |  |
|  |          | R_at_4  |          | have good friends                                      |  |
|  |          | R_at_5  |          | get good job                                           |  |
|  |          | R_at_6  |          | act according to culture                               |  |
|  |          | R_at_7  |          | behave nicely                                          |  |
|  |          | R_at_8  |          | be social                                              |  |
|  |          | R_at_9  |          | respect parents                                        |  |
|  |          | R_at_10 |          | appreciate family                                      |  |
|  |          | R_au_1  |          | au_X: how would ethnic group react if_X no good job    |  |
|  |          | R_au_2  |          | Don't follow religious rules                           |  |
|  |          | R_au_3  |          | Criminal behavior                                      |  |

|                         |        |        |        |                                                                    |                                                                                                                                                                         |
|-------------------------|--------|--------|--------|--------------------------------------------------------------------|-------------------------------------------------------------------------------------------------------------------------------------------------------------------------|
|                         |        | R_au_4 |        | Marry someone of other culture                                     |                                                                                                                                                                         |
|                         |        | R_au_5 |        | Bad grades                                                         |                                                                                                                                                                         |
|                         |        | R_au_6 |        | Don't act according to culture                                     |                                                                                                                                                                         |
| <b>Weapon carrying</b>  |        |        |        |                                                                    |                                                                                                                                                                         |
|                         | P_am_1 | R_am_1 | S_am_1 | Times kid carried a weapon during the past 3 months inside school  | For all "am_X" items:<br>1 = never<br>2 = once<br>3 = two or three times<br>4 = four to six times<br>5 = seven to nine times<br>6 = ten times or more<br>99 = no answer |
|                         | P_am_2 | R_am_2 | S_am_2 | Times kid carried a weapon during the past 3 months outside school |                                                                                                                                                                         |
|                         | P_am_3 | R_am_3 | S_am_3 | Times kid used a weapon at a fight during the past 3 months        |                                                                                                                                                                         |
| <b>Within classroom</b> |        |        |        |                                                                    |                                                                                                                                                                         |
|                         |        | R_ao_1 |        | ao_X: Talk in class about:<br><br>Dutch holidays                   | For all "ao_X" and "aq_X" items:<br>1 = never<br>2 = rarely<br>3 = sometimes<br>4 = often                                                                               |
|                         |        | R_ao_2 |        | Other cultures' holidays                                           |                                                                                                                                                                         |
|                         |        | R_ao_3 |        | Discrimination of foreigners                                       |                                                                                                                                                                         |
|                         |        | R_ao_4 |        | Problems of foreign youths                                         |                                                                                                                                                                         |
|                         |        | R_ao_5 |        | Christianity and other religions                                   |                                                                                                                                                                         |
|                         |        | R_ao_6 |        | Negative aspects of some religions                                 |                                                                                                                                                                         |

|                                 |  |        |        |                                                                                           |                                                                                                                               |
|---------------------------------|--|--------|--------|-------------------------------------------------------------------------------------------|-------------------------------------------------------------------------------------------------------------------------------|
|                                 |  | R_ao_7 |        | Positive aspects of some religions                                                        |                                                                                                                               |
|                                 |  | R_aq_1 |        | Teacher acts on discrimination                                                            |                                                                                                                               |
|                                 |  | R_aq_2 |        | Teacher treat minority pupils differently                                                 |                                                                                                                               |
|                                 |  | R_ar_1 |        | Group of classmates that rules?                                                           | 0 = no<br>1 = yes                                                                                                             |
|                                 |  | R_ar_2 |        | Dominant group that tries to rule?                                                        | 0 = no<br>1 = yes                                                                                                             |
|                                 |  | R_ar_3 |        | Teacher determines teams in gym                                                           | 0 = no<br>1 = yes                                                                                                             |
|                                 |  | R_ar_4 |        | Teacher determines who works together in class                                            | 0 = no<br>1 = yes                                                                                                             |
|                                 |  |        | S_ar_5 | Group of classmates that rules?                                                           | 0 = no<br>1 = yes                                                                                                             |
|                                 |  |        | S_ar_6 | Nomination dominant classmates                                                            |                                                                                                                               |
| <b>Bullying on the Internet</b> |  |        |        |                                                                                           |                                                                                                                               |
|                                 |  | R_as_1 |        | as_X: Internet bullying:<br>Classmates                                                    | For all "as_X" items:<br>1 = never<br>2 = one to five times<br>3 = five to ten times<br>4 = ten to 15 times<br>5 = more often |
|                                 |  | R_as_2 |        | Schoolmates                                                                               |                                                                                                                               |
|                                 |  | R_as_3 |        | Age peer group                                                                            |                                                                                                                               |
|                                 |  | R_as_4 |        | Others                                                                                    |                                                                                                                               |
| <b>Ethnic discrimination</b>    |  |        |        |                                                                                           |                                                                                                                               |
|                                 |  |        | S_at_1 | How often have other kids said something bad or insulting to you because you are.. [ETHN] | For all "at_X" items:<br>1 = never<br>3 = sometimes<br>5 = very often                                                         |
|                                 |  |        | S_at_2 | How often have other kids                                                                 |                                                                                                                               |

|  |  |  |        |                                                                                                      |                                                                       |
|--|--|--|--------|------------------------------------------------------------------------------------------------------|-----------------------------------------------------------------------|
|  |  |  |        | ignored you or left you out of some activity because you are...                                      |                                                                       |
|  |  |  | S_at_3 | How often has someone yelled a racial slur or racial insult at you?                                  |                                                                       |
|  |  |  | S_at_4 | How often has someone threatened to harm you physically because you are..                            |                                                                       |
|  |  |  | S_at_5 | How often has someone treated you unfair because you are ...                                         |                                                                       |
|  |  |  | S_au_1 | How often have other kids said something bad or insulting to someone because of their ethn           | For all "au_X" items:<br>1 = never<br>3 = sometimes<br>5 = very often |
|  |  |  | S_au_2 | How often have other kids ignored someone or left someone out of some activity because of their ethn |                                                                       |
|  |  |  | S_au_3 | How often has someone yelled a racial slur or racial insult at someone                               |                                                                       |
|  |  |  | S_au_4 | How often have kids threatened to harm someone physically someone because of ethn                    |                                                                       |

|                               |  |        |        |                                                                    |                                                                          |
|-------------------------------|--|--------|--------|--------------------------------------------------------------------|--------------------------------------------------------------------------|
|                               |  |        | S_au_5 | How often have kids treated others unfair because of their ethn    |                                                                          |
| <b>Intergroup anxiety</b>     |  |        |        |                                                                    |                                                                          |
|                               |  |        | S_ba_1 | ba_X: Only with Dutch students how would you feel?<br><br>Happy    | For all "ba_X" items:<br>1 = not at all<br>3 = somewhat<br>5 = very much |
|                               |  |        | S_ba_2 | Awkward                                                            |                                                                          |
|                               |  |        | S_ba_3 | Confident                                                          |                                                                          |
|                               |  |        | S_ba_4 | Safe                                                               |                                                                          |
|                               |  |        | S_ba_5 | Defensive                                                          |                                                                          |
|                               |  |        | S_ba_6 | Relaxed                                                            |                                                                          |
|                               |  |        | S_bb_1 | bb_X: Only with Turkish students how would you feel?<br><br>Happy  | For all "bb_X" items:<br>1 = not at all<br>3 = somewhat<br>5 = very much |
|                               |  |        | S_bb_2 | Awkward                                                            |                                                                          |
|                               |  |        | S_bb_3 | Confident                                                          |                                                                          |
|                               |  |        | S_bb_4 | Safe                                                               |                                                                          |
|                               |  |        | S_bb_5 | Defensive                                                          |                                                                          |
|                               |  |        | S_bb_6 | Relaxed                                                            |                                                                          |
|                               |  |        | S_bc_1 | bc_X: Only with Moroccan students how would you feel?<br><br>Happy | For all "bc_X" items:<br>1 = not at all<br>3 = somewhat<br>5 = very much |
|                               |  |        | S_bc_2 | Awkward                                                            |                                                                          |
|                               |  |        | S_bc_3 | Confident                                                          |                                                                          |
|                               |  |        | S_bc_4 | Safe                                                               |                                                                          |
|                               |  |        | S_bc_5 | Defensive                                                          |                                                                          |
|                               |  |        | S_bc_6 | Relaxed                                                            |                                                                          |
| <b>Opinions towards study</b> |  |        |        |                                                                    |                                                                          |
|                               |  | R_an_1 |        | Importance of studies like this one                                | For all "an_X" items:<br>1 = very<br>3 = neutral<br>7 = not at all       |
|                               |  | R_an_2 |        | How exhausting was filling in questionnaire?                       |                                                                          |

|                                                            |  |                   |                    |                                                          |                                                                                                                                 |
|------------------------------------------------------------|--|-------------------|--------------------|----------------------------------------------------------|---------------------------------------------------------------------------------------------------------------------------------|
|                                                            |  | R_an_3            |                    | How much fun was filling in questionnaire                |                                                                                                                                 |
|                                                            |  | R_an_4            |                    | Accuracy motivation                                      |                                                                                                                                 |
| <b>Out-of-class friends</b> (See “note before using data”) |  |                   |                    |                                                          |                                                                                                                                 |
|                                                            |  | C_a_1-<br>C_1_241 |                    | How long does i know j                                   | See “note before using data”                                                                                                    |
|                                                            |  | C_b_1-<br>C_b_241 | D_b_1 –<br>D_b_241 | How often do i and j meet outside school                 | 1 = every day<br>2 = multiple times a week<br>3 = once a week<br>4 = less than once a week<br>5 = we only meet inside of school |
|                                                            |  | C_c_1-<br>C_c_241 | D_c_1 –<br>D_c_241 | How good is friendship between i and j                   | 1 = best friends,<br>2= good friends,<br>3 = just friends,<br>4 = acquaintances                                                 |
|                                                            |  | C_d_1-<br>C_d_241 |                    | j's music taste: Dutch Pop                               |                                                                                                                                 |
|                                                            |  | C_e_1-<br>C_e_241 |                    | j's music taste: Dutch Hiphop                            |                                                                                                                                 |
|                                                            |  | C_f_1-<br>C_f_241 |                    | j's music taste: English Pop                             |                                                                                                                                 |
|                                                            |  | C_g_1-<br>C_g_241 |                    | j's preferences: hanging on street                       |                                                                                                                                 |
|                                                            |  | C_h_1-<br>C_h_241 |                    | j's preferences: going to school                         |                                                                                                                                 |
|                                                            |  | C_i_1-<br>C_i_241 |                    | j's preferences: wearing branded cloths                  |                                                                                                                                 |
|                                                            |  |                   | D_j_1 –<br>D_j_241 | Does friend i help j when j has problems (e.g. at home)? | 1 = no, never, 2, 3 = sometimes, 4, 5 =yes, always                                                                              |
|                                                            |  |                   |                    | Street name (home address)                               | Not included in data set (privacy)                                                                                              |
|                                                            |  |                   |                    | ZIP-code (home address)                                  | Not included in data set (privacy)                                                                                              |
| woonplaats                                                 |  |                   |                    | City (home address)                                      |                                                                                                                                 |

|           |  |          |          |                                                |                          |
|-----------|--|----------|----------|------------------------------------------------|--------------------------|
| basissch  |  |          |          | ID number of primary school attended           |                          |
| Citoscore |  |          |          | Result of CITO test in primary school          |                          |
|           |  | nl_1     | nl_2     | Dutch                                          | Wave 6 grades for year 1 |
|           |  | en_1     | en_2     | English                                        | Wave 7 grades for year 2 |
|           |  | fa_1     | fa_2     | French                                         |                          |
|           |  | du_1     | du_2     | German                                         |                          |
|           |  | la_1     | la_2     | Latin                                          |                          |
|           |  | gr_1     | gr_2     | Greek                                          |                          |
|           |  | wis_1    | wis_2    | Math                                           |                          |
|           |  | re_1     | re_2     | Math – called differently in some schools      |                          |
|           |  | gs_1     | gs_2     | History                                        |                          |
|           |  | ak_1     | ak_2     | Geography                                      |                          |
|           |  | bi_1     | bi_2     | Biology                                        |                          |
|           |  | na_sk_1  | na_sk_2  | Chemistry (scheikunde)                         |                          |
|           |  | binask_1 | binask_2 | Nature science (biologie/natuurkunde)          |                          |
|           |  | nasktc_1 | nasktc_2 | Nature science (natuurkunde/ch emistry)        |                          |
|           |  | if_1     | if_2     | Computer science (informatica)                 |                          |
|           |  | tc_1     | tc_2     | Mechanics (techniek)                           |                          |
|           |  | vz_1     | vz_2     | Personal and domestic care taking (verzorging) |                          |
|           |  | bv_1     | bv_2     | Arts (beeldende vorming)                       |                          |
|           |  | te_1     | te_2     | Arts (tekenen)                                 |                          |
|           |  | mu_1     | mu_2     | Music                                          |                          |
|           |  | ku_cu_1  | ku_cu_2  | Arts and Culture (kunst en cultuur)            |                          |
|           |  | dr_1     | dr_2     | Theater (drama)                                |                          |

|  |  |        |        |                                            |  |
|--|--|--------|--------|--------------------------------------------|--|
|  |  | lo_1   | lo_2   | Sport<br>(gymnastiek)                      |  |
|  |  | msch_1 | msch_2 | Social Science<br>(mens &<br>maatschappij) |  |
|  |  | lb_1   | lb_2   | Ethics<br>(levensbeschou<br>wing)          |  |
